# Supplementary material for: Pregnancy in women with congenital heart disease
Source: HighWire-hosted journal article supplement (doi:10.1136/bmj.k478), 2018-03-09

Many cardiac medicines appear safe for use during and after pregnancy, as summarised here. However, evidence is lacking for some drugs, and many of them carry risks of adverse events. Shared decision making, considering risks and benefits of medicines, is vital to help women weigh up potential risks to themselves and their unborn baby.

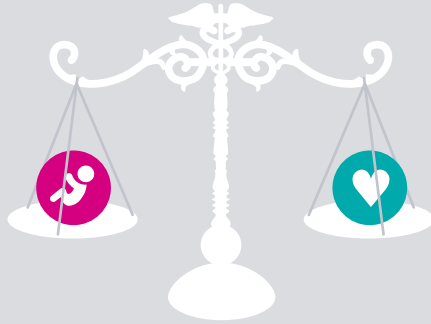

## KEY

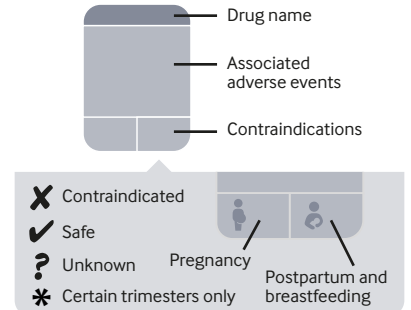

### β blockers

These are commonly used by pregnant women. However, organ-specific malformations are more prevalent in the offspring of women treated with β blockers, and fetal growth restriction has been reported

| Drug name         | When used near term:                                          | When used in second and third trimester:                     |
|-------------------|---------------------------------------------------------------|--------------------------------------------------------------|
| <b>Labetalol</b>  | Fetal hypoglycaemia<br>Fetal bradycardia<br>Fetal hypotension |                                                              |
| <b>Bisoprolol</b> | Fetal hypoglycaemia<br>Fetal bradycardia                      |                                                              |
| <b>Atenolol</b>   |                                                               | Fetal hypoglycaemia<br>Fetal bradycardia<br>Low birth weight |

Icons: Pregnancy (woman), Postpartum (woman and baby)

| Drug name         | Associated adverse events                                                                |
|-------------------|------------------------------------------------------------------------------------------|
| <b>Methyldopa</b> | Mild neonatal hypotension. Avoid post partum because of the risk of postnatal depression |
| <b>Digoxin</b>    | Serum levels are unreliable                                                              |

Icons: Pregnancy (woman), Postpartum (woman and baby)

### Calcium channel blockers

Not associated with an increased incidence of congenital anomalies in humans

| Drug name         | Notes                                                                                          |
|-------------------|------------------------------------------------------------------------------------------------|
| <b>Nifedipine</b> | Potential synergism with magnesium sulphate can induce hypotension in mother and fetal hypoxia |
| <b>Verapamil</b>  | Limited evidence<br>Well tolerated                                                             |

Icons: Pregnancy (woman), Postpartum (woman and baby)

### Platelet aggregation inhibitors

| Drug name                   | Notes                                                                                                         |
|-----------------------------|---------------------------------------------------------------------------------------------------------------|
| <b>Acetylsalicylic acid</b> | Low dose aspirin safe in early pregnancy, but usually stopped at 34–36 weeks. No teratogenic effects reported |
| <b>Clopidogrel</b>          | Limited evidence<br>Safe in animal studies, but caution is advised. Stop one week before anticipated delivery |

Icons: Pregnancy (woman), Postpartum (woman and baby)

### Antiarrhythmic drugs

| Drug name           | Notes                                                                                                                            |
|---------------------|----------------------------------------------------------------------------------------------------------------------------------|
| <b>Adenosine</b>    | Limited evidence<br>No fetal adverse effects reported                                                                            |
| <b>Procainamide</b> | Limited evidence<br>Unknown. Appears to be safe                                                                                  |
| <b>Flecainide</b>   | Limited evidence<br>Unknown. Appears to be safe                                                                                  |
| <b>Amiodarone</b>   | Might be used in special circumstances. Risk of hypothyroidism, goitre, bradycardia, fetal growth restriction, and preterm birth |

Icons: Pregnancy (woman), Postpartum (woman and baby)

### Diuretics and aldosterone antagonists

| Drug name                                              | Notes                                                  |
|--------------------------------------------------------|--------------------------------------------------------|
| <b>Bumetanide, furosemide, and hydrochlorothiazide</b> | Oligohydramnios and electrolyte imbalance in the fetus |

Icons: Pregnancy (woman), Postpartum (woman and baby)

### Anticoagulants

| Drug name                             | Notes                                                                                                                  |
|---------------------------------------|------------------------------------------------------------------------------------------------------------------------|
| <b>Warfarin</b>                       | Risk of fetal abnormalities if used in the first trimester. Can cause intracranial fetal bleeding in second trimester. |
| <b>Heparin (low molecular weight)</b> | Seldom osteoporosis and markedly less thrombocytopenia than unfractionated heparin.                                    |

Icons: Pregnancy (woman), Postpartum (woman and baby)

### Drugs contraindicated in pregnancy

| Drug name                            | Notes                                                                                        |
|--------------------------------------|----------------------------------------------------------------------------------------------|
| <b>ACE inhibitors†</b>               | High risk of fetal abnormalities. Captopril and Lisinopril considered safe in breast feeding |
| <b>Angiotensin receptor blockers</b> | High risk of fetal abnormalities                                                             |
| <b>Spirolactone</b>                  | Limited evidence<br>Possible risk of anomalies of the external genitalia                     |

Icons: Pregnancy (woman), Postpartum (woman and baby)

† ACE inhibitors = Angiotensin converting enzyme inhibitors

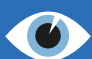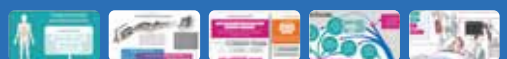

Supplement: pregnancy_heart_disease_v28_web.pdf [file pregnancy_heart_disease_v28_web.pdf]
